# Supplementary material
Source: HighWire-hosted journal article supplement (doi:10.1101/rna.032052.111)
Supplement: SuppLegends.docx [file SuppLegends.docx]

**Supplementary Table S1:** Alignments included in the analysis, where the following information is listed for each alignment: Alignment, # Sequences, PDB ID (Alignment Accession), and Source.

**Supplementary Table S2:** Alignment scores based on the fraction of isosteric and non-isosteric base pairs (data used to generate **Fig. 2**).

**Supplementary Table S3:** IDI change versus the fraction of positions changed (data used to generate **Fig. 4**).
